# Supplementary material for: Satellite tracking of juvenile whale sharks in the Sulu and Bohol Seas, Philippines
Source: PubMed Central journal article supplement (PMC6063259; doi:10.7717/peerj.5231), 2018-07-24

P - 430

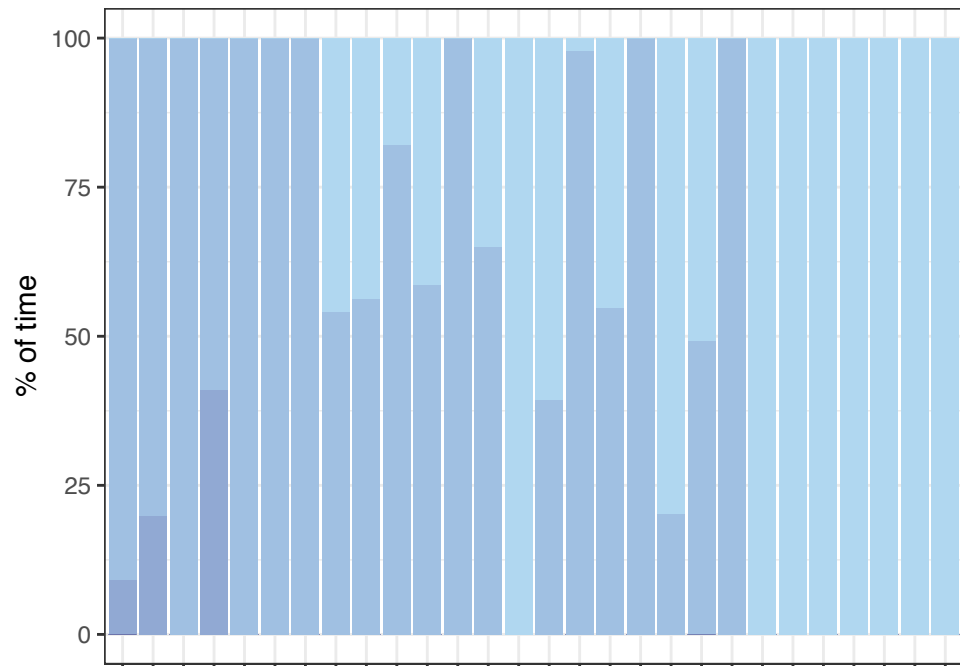

P - 430

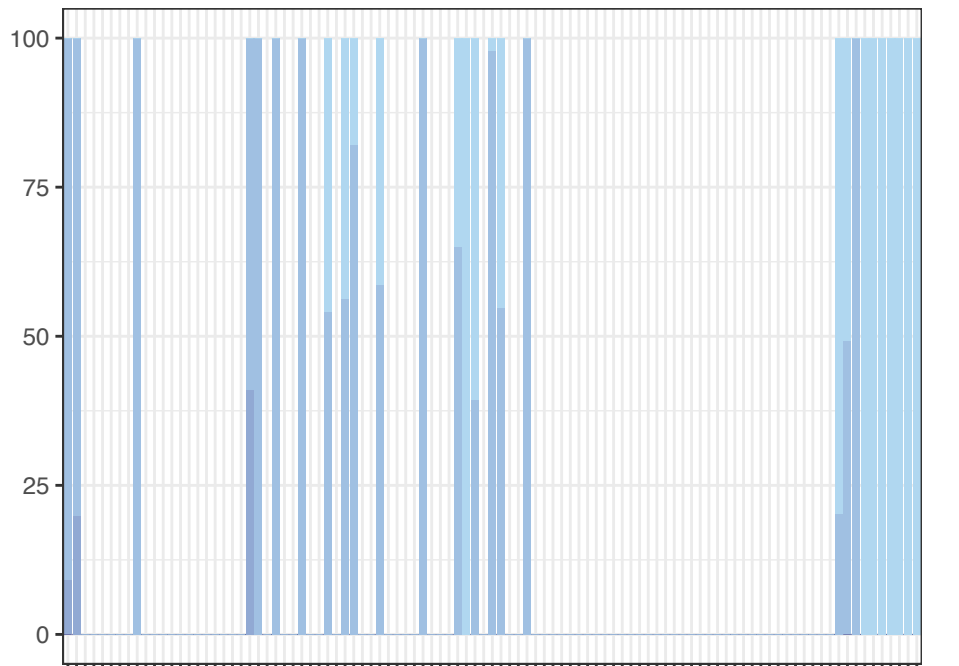

10-Apr-2015

1-Jun-2015

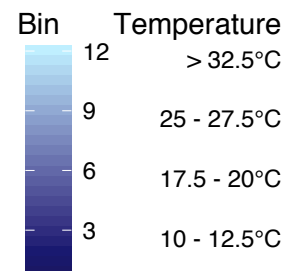

P - 430 Day

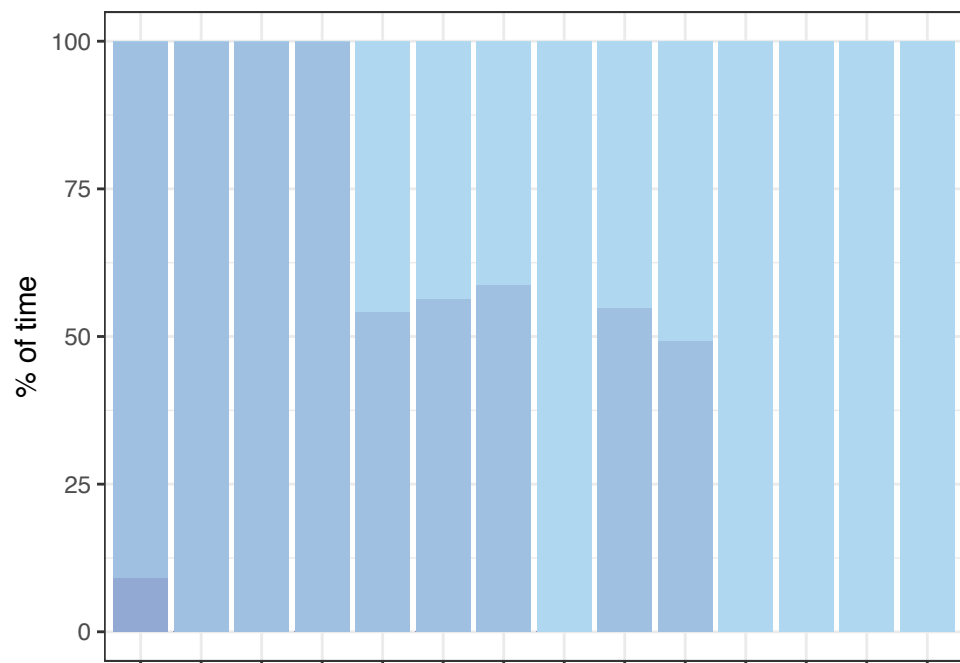

P - 430 Night

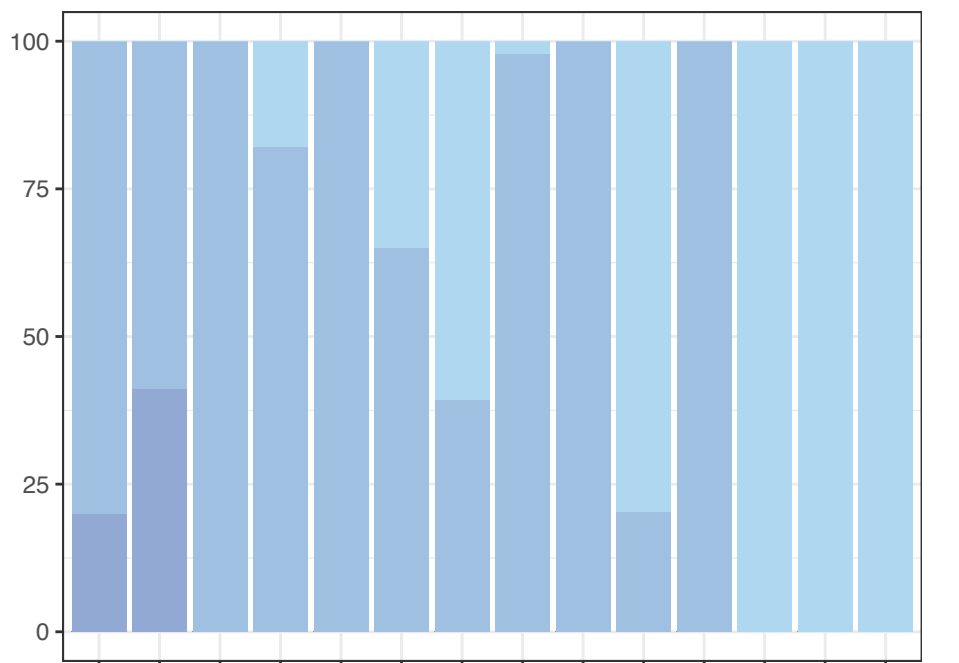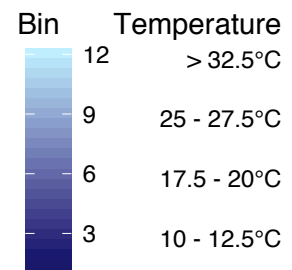

Supplement: peerj-06-5231-s001.pdf [file peerj-06-5231-s001.pdf]
