# Supplementary material for: Satellite tracking of juvenile whale sharks in the Sulu and Bohol Seas, Philippines
Source: PubMed Central journal article supplement (PMC6063259; doi:10.7717/peerj.5231), 2018-07-24

P - 532

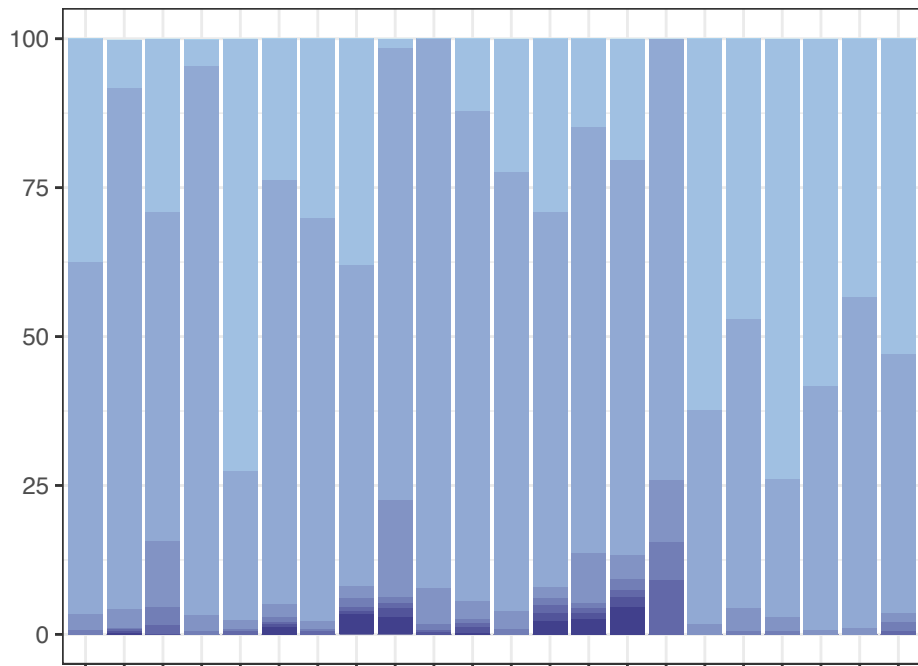

P - 532

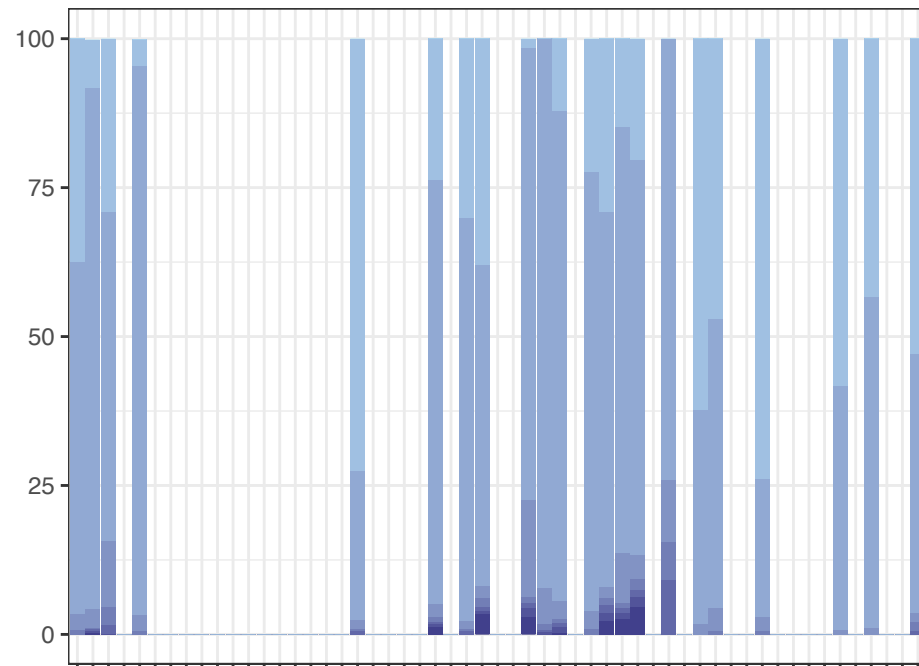

16-Nov-2015

14-Dec-2015

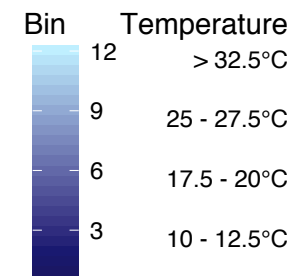

P - 532 Day

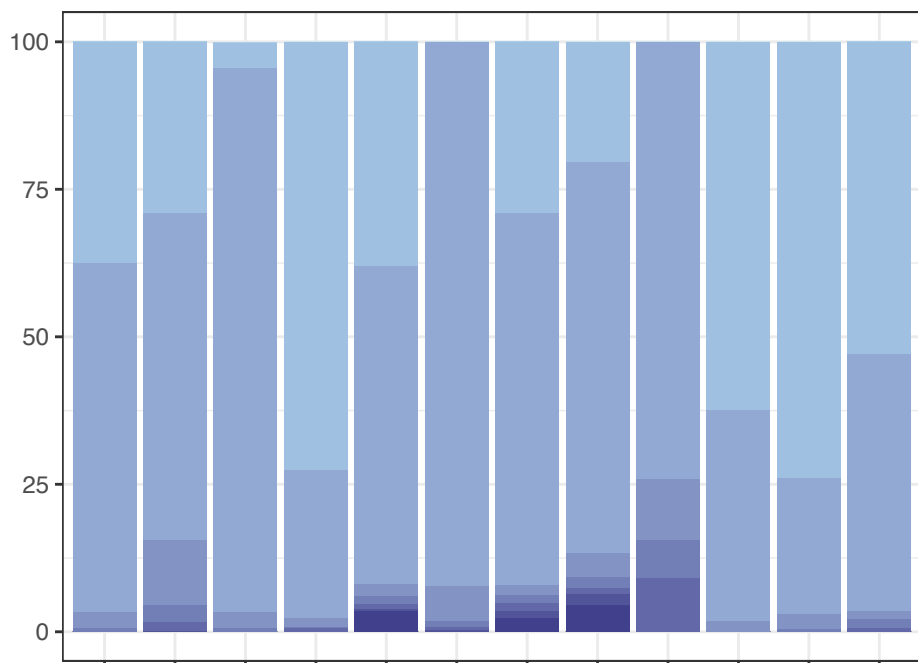

P - 532 Night

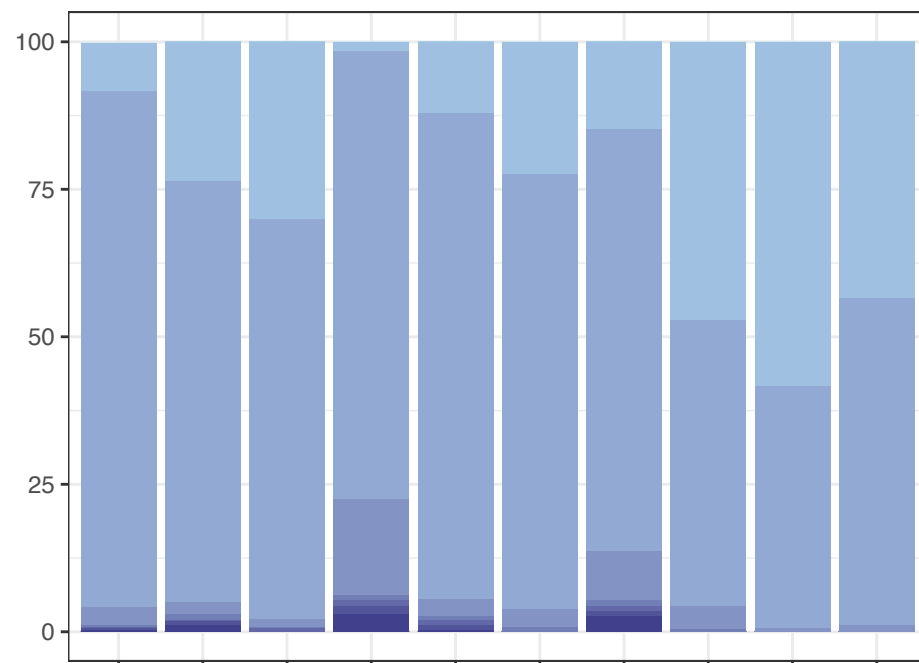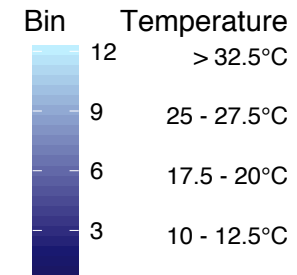

Supplement: peerj-06-5231-s002.pdf [file peerj-06-5231-s002.pdf]
