# Supplementary material for: Satellite tracking of juvenile whale sharks in the Sulu and Bohol Seas, Philippines
Source: PubMed Central journal article supplement (PMC6063259; doi:10.7717/peerj.5231), 2018-07-24

P - 970

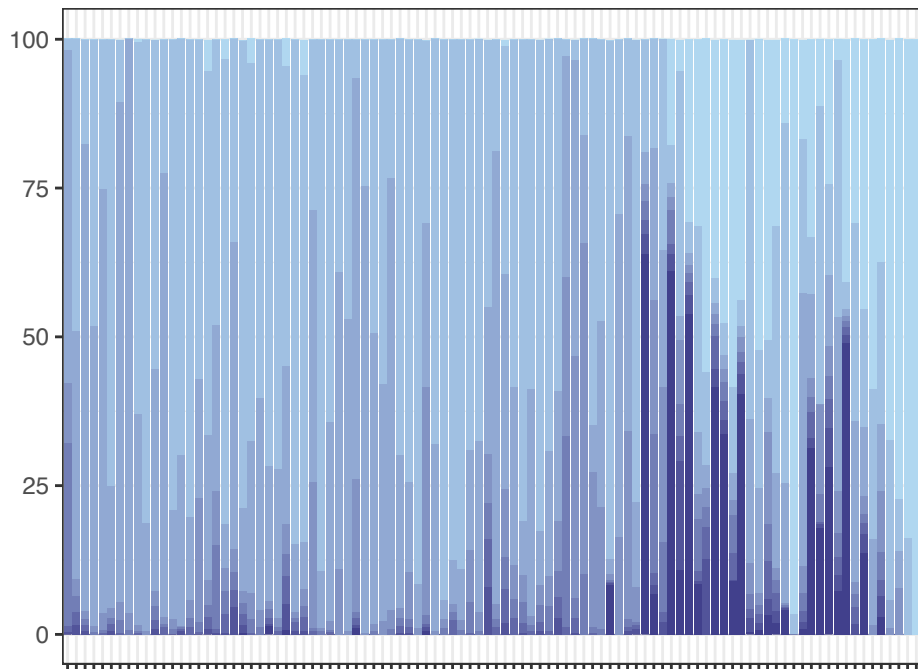

P - 970

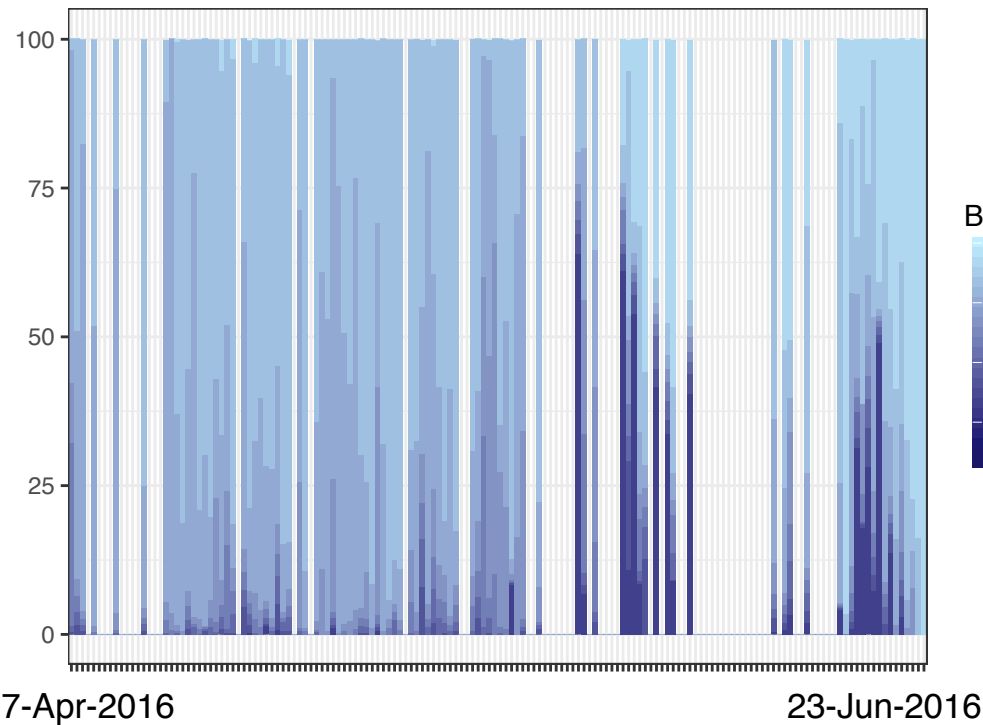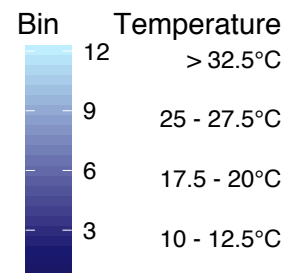

P - 970 Day

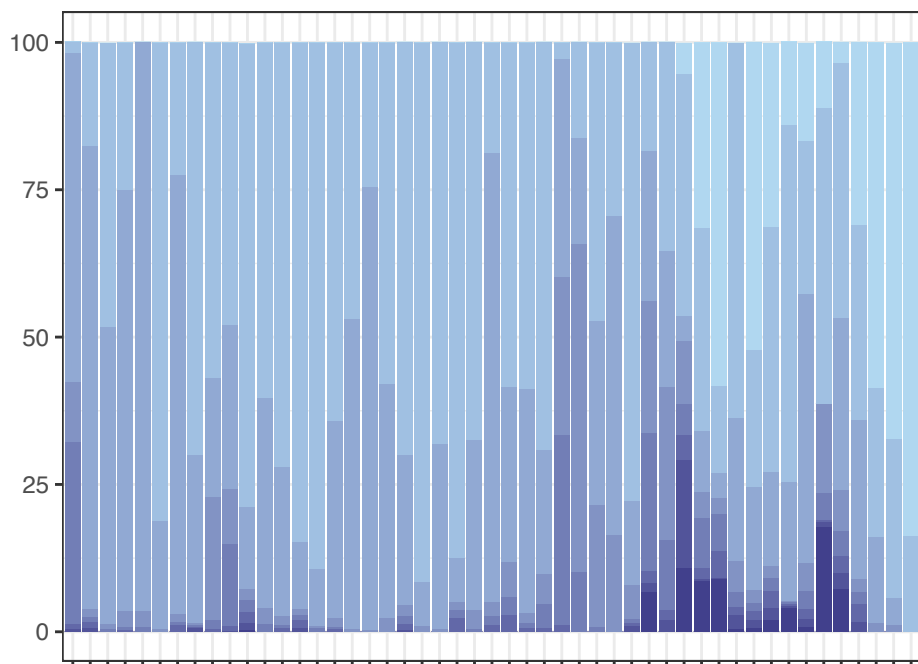

P - 970 Night

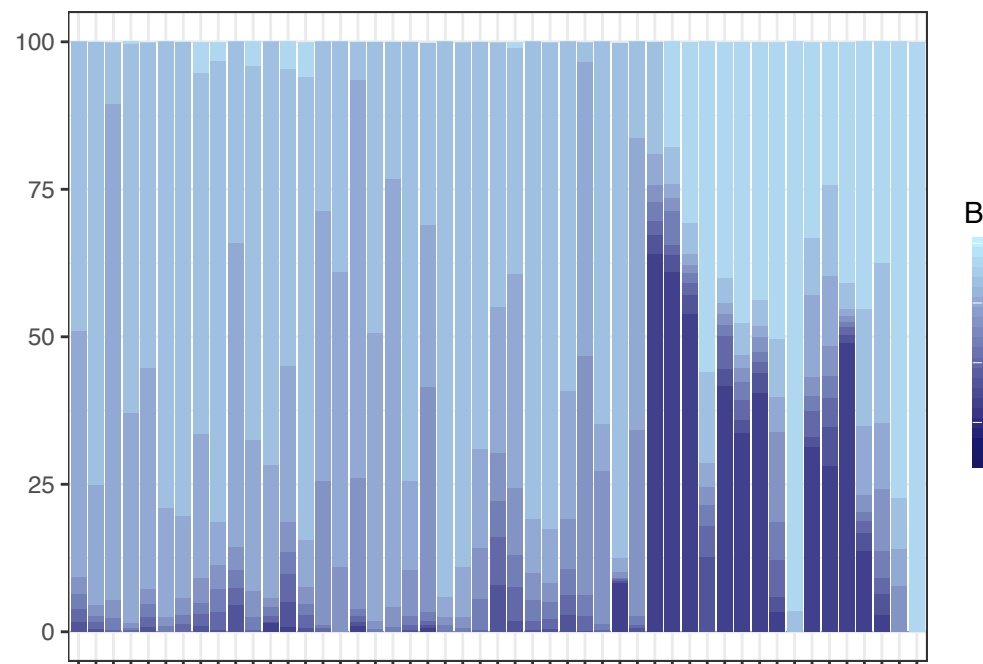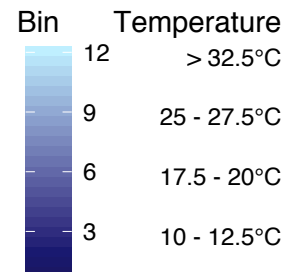

Supplement: peerj-06-5231-s014.pdf [file peerj-06-5231-s014.pdf]
