# Supplementary material for: Satellite tracking of juvenile whale sharks in the Sulu and Bohol Seas, Philippines
Source: PubMed Central journal article supplement (PMC6063259; doi:10.7717/peerj.5231), 2018-07-24

P - 926

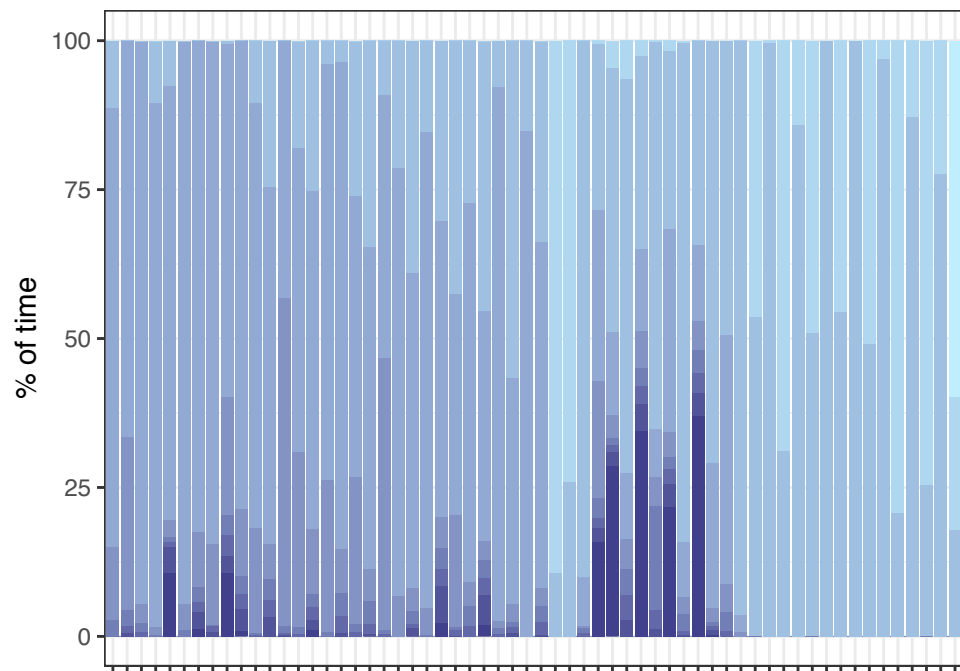

P - 926

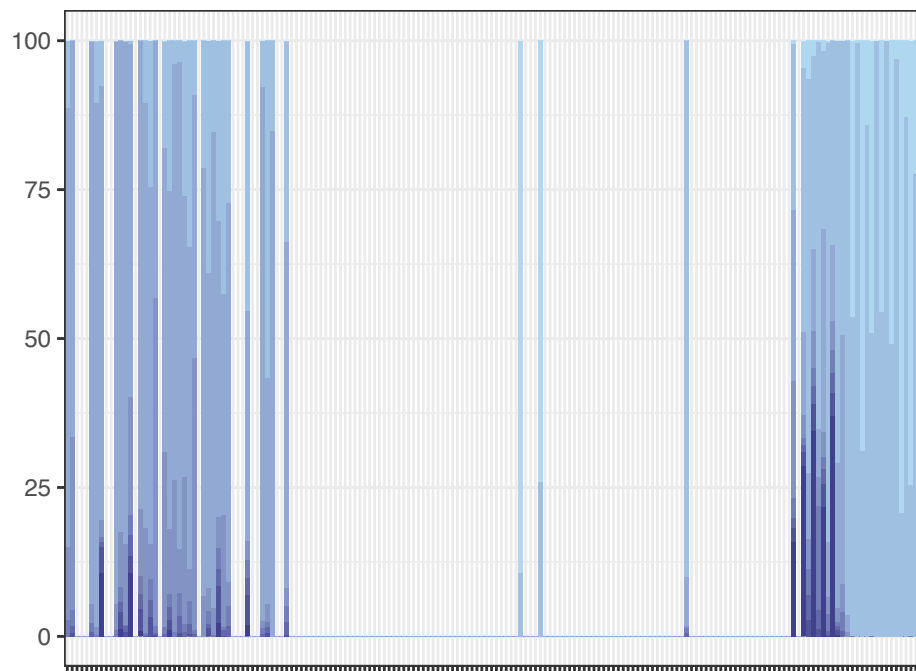

19-Mar-2016

17-Jun-2016

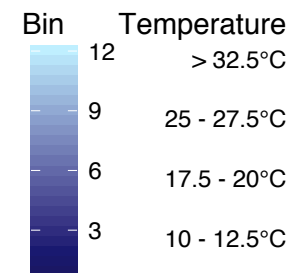

P - 926 Day

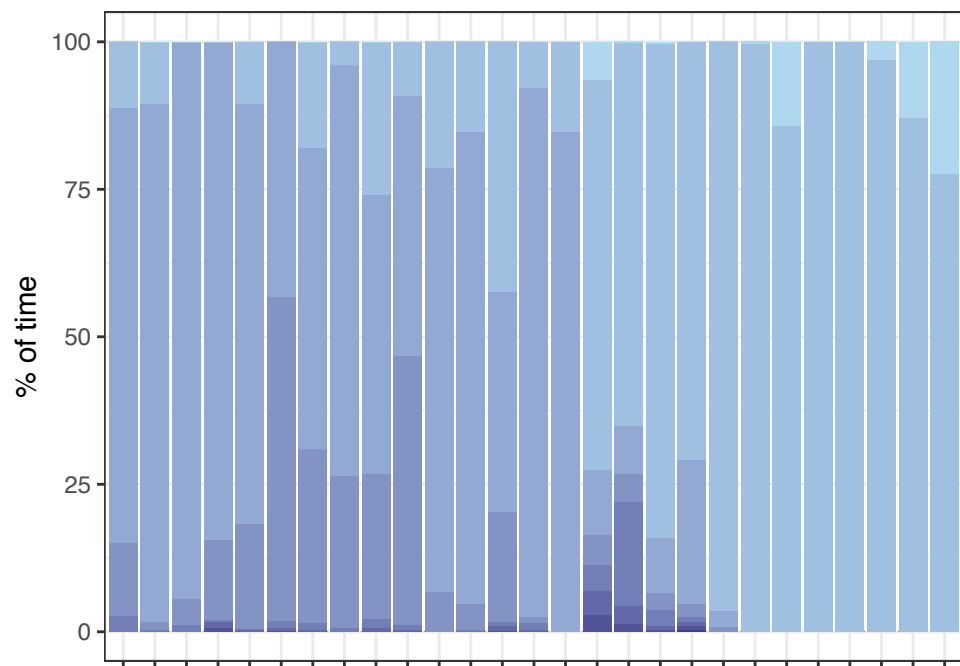

P - 926 Night

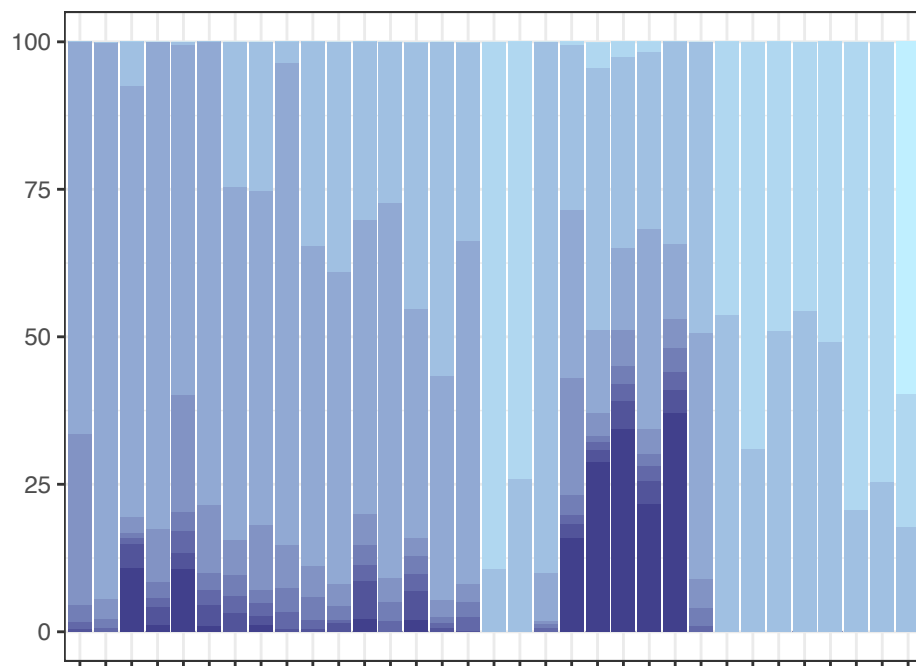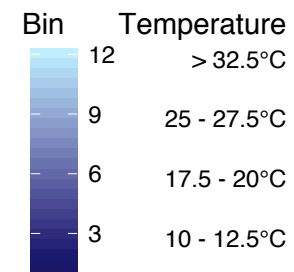

Supplement: peerj-06-5231-s016.pdf [file peerj-06-5231-s016.pdf]
